# Supplementary material
Source: PubMed Central journal article supplement (PMC2375939)
Supplement: rsbl20060606s12.pdf [file rsbl20060606s12.pdf]

Electronic Supplementary Material for:

**Phylogenetic relationships and divergence times of Charadriiformes genera: multigene evidence for the Cretaceous origin of at least 14 clades of shorebirds**

Allan J. Baker<sup>1,2,§</sup>, Sérgio L. Pereira<sup>1</sup>, Tara A. Paton<sup>1</sup>

<sup>1</sup>Department of Natural History, Royal Ontario Museum, 100 Queen's Park Crescent, Toronto, ON, Canada, M5S 2C6

<sup>2</sup>Department of Ecology and Evolutionary Biology, University of Toronto, Toronto, ON, Canada, M5S 1A1

**Taxon sampling**

We obtained blood or tissue samples from 90 out of 96 genera of Charadriiformes, including two species of *Turnix* which is known to be embedded within Charadriiformes (Paton et al. 2003) and seven outgroup species (Supplementary Table 1) for DNA amplification and sequencing. These samples are deposited at the LSU Museum of Natural Science Collection of Genetic Resources, USA (*Hydrophasianus*, *Irediparra*, *Pluvianus* and *Rhinoptilus*), Zoological Museum of the University of Copenhagen, Denmark (*Anous*, *Creagrus*, *Gygys* and *Rhodostethia*) and the Royal Ontario Museum (all remaining species). DNA or tissue samples from six other genera (*Dromas*, *Prosobonia*, *Metopidius*, *Gabianus*, *Leucopheus* and *Procelsterna*) were not available. We also did not have DNA or tissue samples for *Pinguinus impennis*, but included the

small ribosomal subunit (12S rDNA) and cytochrome b (*cyt b*) sequences for this species deposited in GenBank in our analyses.

### **DNA isolation, amplification, sequencing, and sequence alignments**

DNA was extracted from blood or tissue samples using standard protocols (Sambrook et al. 1989). Chosen fragments for amplification and sequencing were the mitochondrial 12S rDNA, NADH dehydrogenase subunit 2 (ND2) and *cyt b* genes [primers designed by O. Haddrath and described in Pereira and Baker (2004)] and the nuclear recombination activating protein (RAG-1) gene [primers R13, R18, R17, R22, R21 and R2b described in Groth and Barrowclough (1999)]. Mitochondrial and nuclear amplifications were performed as previously described in Pereira and Baker (2005) and Groth and Barrowclough (1999), respectively. PCR products were recovered from 1% agarose gels, purified by centrifuging each through a filter tip, and were cycle-sequenced and run on a Li-Cor 4200 bidirectional automated DNA sequencer or an ABI 3100 automated DNA sequencer according to the manufacturer's suggested protocols. We used Sequencher 4.1.2 (GeneCodes Corp, Inc, Ann Arbor, Michigan) to check both L- and H-strands sequences for ambiguities and scored them following the standard IUB codes. Final consensus sequences for all gene fragments were exported and visually aligned in MacClade 4.0 (Maddison & Maddison 2000), and then concatenated into a matrix of 5,199 base pairs (bp), including alignment gaps. All sequences obtained in this study were deposited in GenBank (See Supplementary Table 1 for accession numbers).

### **Phylogenetic Bayesian inference**

We inferred the phylogenetic relationships among Charadriiformes by applying a Metropolis-coupled Markov chain Monte Carlo (MCMC) Bayesian approach as implemented in MrBayes 3.1.2 (Ronquist & Huelsenbeck 2003). We ran two simultaneous independent runs, each starting with a different random tree. Each run was set to have one cold and five heated chains to allow better mixing of the MCMC chain and minimize the chance of being trapped in local optima. The addition of more heated chains allows for quicker convergence of large and complex data sets such as the one gathered in our study. We considered runs to have reached convergence when the average standard deviation of the split frequencies between both simultaneous runs was smaller than 0.01. We performed runs under the GTR + i + g model of DNA substitution (as selected by MrModeltest 2.0[Nylander, 2004]), assuming the same topology to be shared among all partitions but model parameters to be unlinked across partitions. We also assumed *a priori* among-partition rate variation. All trees were considered equally likely. The tree was rooted with sequences from the Ostrich (*Struthio camelus*). Other priors applied for all partitions were: unconstrained:exponential (10.0) for branch lengths, flat Dirichlet (1,1,1,1) for stationary base frequencies, flat Dirichlet (1,1,1,1,1,1) for the nucleotide substitution ratio, uniform distribution (0,200) for the shape parameter of the gamma distribution of rate variation and uniform distribution (0,1) for the proportion of invariable sites. MCMC samples were taken in every 1000<sup>th</sup> cycle. We plotted the log likelihood of sampled topologies to determine the burn-in period in which the MCMC chain had reached a stationary status. Post-burn-in samples from both simultaneous and independent runs were used to construct a 50% majority rule consensus tree. The proportion of trees in which nodes were recovered after the burn-in period is interpreted

as the posterior probability (PP) of that node, or the probability that that node is true. Nodes receiving  $PP \geq 0.95$  were considered to be strongly supported.

### **Molecular dating**

For each data partition used in the Bayesian inference of phylogeny, we obtained maximum likelihood estimates of the transition/transversion ratio, and nucleotide frequencies in PAML 3.14 (Yang 1997) under the F84 model of DNA substitution assuming rate variation across sites to follow a gamma distribution with five discrete rate categories (Hasegawa et al. 1985). These parameters were used to estimate branch lengths for each data partition and their approximate variance-covariance matrix to derived estimates of divergence times and 95% credibility intervals (95% CrI) based on all data partitions in a Bayesian framework (Supplementary Table 2) (Thorne & Kishino 2002; Thorne et al. 1998). These methods are implemented in the software ESTBRANCHES and MULTIDIVTIME from the MULTIDISTRIBUTE package, freely available from J. Thorne's website: <http://statgen.ncsu.edu/thorne/multidivtime.html>. The method requires an outgroup to root the tree and imposes the condition that the rate of change in the rate of DNA substitution at the root node is the same at the beginning and at the end of that branch (Kishino et al. 2001; Thorne et al. 1998).

Bayesian dating was run assuming a burnin period = 5,000, sample frequency = 200, number of samples = 10,000. We set the following gamma priors: expected time between tip and root (rttm) = 122.2 Mya (Pereira & Baker 2006) with standard deviation (SD) = 20 Mya, rate of the root node (rtrate) and its SD = 0.00556 substitutions per site per million years as estimated from the median of the tip-to-root branch lengths for all

genes. However, it seems of little practical importance to specify these priors because they do not appear to have any appreciable effect on the Bayesian posterior distribution of node ages and rates of evolution, and because sequence data and time constraints should determine the overall rate and the age of the root (Yang & Yoder 2003). We also set the prior for the rate change between ancestral (brownmean) and descendant nodes = 0.00818 (SD = 0.00818) substitutions per site per million of years, so that  $r_{\text{tm}} \times \text{brownmean} = 1$ . This later prior follows the suggestion that this is a meaningful value for real and simulated data sets (Wiegmann et al. 2003). Because *a priori* information for rate change is unknown, a large SD value was chosen as suggested (Thorne & Kishino 2002), which allows a gene to have *a priori* a large variation in rate change over time. We assessed the convergence of the MCMC algorithm by running multiple analyses (each one starting with a different randomly selected initial state) and comparing the posterior distribution of divergence times, branch lengths and the proportion of successful changes of those parameters along the Markov chain.

### **Temporal constraints in molecular dating**

The Bayesian method allows the use of prior information about the age of diversification to be incorporated in the analysis. Hence, we used multiple fossils to set a minimum age for 14 nodes spread throughout the tree (Supplementary Table 3). Additionally, we fixed the ages for the separation of Galloanserae and Neoaves at 122.2 Mya and between Galliformes and Anseriformes at 101.7 Mya based on a Bayesian molecular time estimates derived from complete mitochondrial genomes and assuming several independent time constraints from the fossil record (Pereira & Baker 2006).

## References

- Brodkorb, P. 1964 Catalogue of fossil birds, part 2 (Anseriformes through Galliformes). *Bull Florida State Mus Biol Sci* **8**, 195-335.
- Clarke, J. A., Tambussi, C. P., Noriega, J. I., Erickson, G. M. & Ketchum, R. A. 2005 Definitive fossil evidence for the extant avian radiation in the Cretaceous. *Nature* **433**, 305-308.
- Groth, J. G. & Barrowclough, G. F. 1999 Basal divergences in birds and the phylogenetic utility of the nuclear RAG-1 gene. *Mol Phylogenet Evol* **12**, 115-123.
- Hasegawa, M., Kishino, H. & Yano, T. 1985 Dating of the human-ape splitting by a molecular clock of mitochondrial DNA. *J Mol Evol* **22**, 160-174.
- Kishino, H., Thorne, J. L. & Bruno, W. J. 2001 Performance of a divergence time estimation method under a probabilistic model of rate evolution. *Mol Biol Evol* **18**, 352-361.
- Maddison, D. R. & Maddison, W. P. 2000 *MacClade 4.0*. Sunderland: Sinauer Associates, Inc.
- Nylander, J. A. 2004 MrModeltest 2.0. Program distributed by the author. Evolutionary Biology Centre, Uppsala University.
- Paton, T. A., Baker, A. J., Groth, J. G. & Barrowclough, G. F. 2003 RAG-1 sequences resolve phylogenetic relationships within Charadriiform birds. *Mol Phylogenet Evol* **29**, 268-278.
- Pereira, S. L. & Baker, A. J. 2004 Vicariant speciation of curassows (Aves, Cracidae): a hypothesis based on mitochondrial DNA phylogeny. *The Auk* **121**, 682-694.
- Pereira, S. L. & Baker, A. J. 2005 Multiple gene evidence for parallel evolution and retention of ancestral morphological states in the shanks (Charadriiformes: Scolopacidae). *Condor* **107**, 514-526.
- Pereira, S. L. & Baker, A. J. 2006 A mitogenomics timescale for birds detects variable phylogenetic rates of molecular evolution and refutes the standard molecular clock. *Mol Biol Evol* **23**, 1731-1740.
- Ronquist, F. & Huelsenbeck, J. P. 2003 MrBayes 3: Bayesian phylogenetic inference under mixed models. *Bioinformatics* **19**, 1572-1574.
- Sambrook, J., Fritsch, E. F. & Maniatis, T. 1989 *Molecular cloning*. Cold Spring Harbor, NY: Cold Spring Harbor Laboratory Press.
- Thorne, J. L. & Kishino, H. 2002 Divergence time and evolutionary rate estimation with multilocus data. *Syst Biol* **51**, 689-702.
- Thorne, J. L., Kishino, H. & Painter, I. S. 1998 Estimating the rate of evolution of the rate of molecular evolution. *Mol Biol Evol* **15**, 1647-1657.
- Wiegmann, B. M., Yeates, D. K., Thorne, J. L. & Kishino, H. 2003 Time flies, a new molecular time-scale for brachyceran fly evolution without a clock. *Syst Biol* **52**, 745-56.
- Yang, Z. 1997 PAML: a program package for phylogenetic analysis by maximum likelihood. *Comput Appl Biosci* **13**, 555-6.
- Yang, Z. & Yoder, A. D. 2003 Comparison of likelihood and Bayesian methods for estimating divergence times using multiple gene loci and calibration points, with application to a radiation of cute-looking mouse lemur species. *Syst Biol* **52**, 705-716.

Supplementary Table 1. Taxon sampling and GenBank accession numbers.

| Family          | Species                           | RAG-1                        | 12S rDNA  | ND2       | cyt <i>b</i> |          |
|-----------------|-----------------------------------|------------------------------|-----------|-----------|--------------|----------|
| Alcidae         | <i>Aethia cristatella</i>         | EF373165                     | EF373064  | EF373219  | U37087       |          |
|                 | <i>Alca torda</i>                 | AY228788                     | EF373065  | EF373220  | U37288       |          |
|                 | <i>Alle alle</i>                  | EF373166                     | AJ242684  | EF373221  | U37287       |          |
|                 | <i>Brachyramphus brevirostris</i> | EF373172                     | EF373070  | EF373227  | U63058       |          |
|                 | <i>Cepphus columba</i>            | EF373173                     | X76349    | EF373229  | U37293       |          |
|                 | <i>Cerorhinca monocerata</i>      | EF373174                     | EF373072  | EF373230  | U37295       |          |
|                 | <i>Cyclorhynchus psittacula</i>   | EF373179                     | EF373077  | EF373235  | U37296       |          |
|                 | <i>Fratercula arctica</i>         | AY228787                     | DQ385279  | DQ385092  | DQ385228     |          |
|                 | <i>Pinguinus impennis</i>         | -                            | AJ242685  | -         | AJ242685     |          |
|                 | <i>Ptychoramphus aleuticus</i>    | EF373204                     | EF373103  | EF373261  | U37302       |          |
|                 | <i>Synthliboramphus antiquus</i>  | EF373212                     | EF373111  | EF373269  | U37303       |          |
|                 | <i>Uria lomvia</i>                | EF373216                     | AJ242687  | EF373273  | U37308       |          |
|                 | Burhinidae                        | <i>Burhinus vermiculatus</i> | AY228771  | EF380264  | EF380265     | -        |
|                 |                                   | <i>Esacus magnirostris</i>   | AY228769  | DQ385270  | DQ385083     | DQ385219 |
| Charadriidae    | <i>Anarhynchus frontalis</i>      | EF373167                     | EF380263  | EF373222  | EF373118     |          |
|                 | <i>Charadrius vociferus</i>       | AF143736                     | DQ385269  | DQ385082  | DQ385218     |          |
|                 | <i>Elseyornis melanops</i>        | EF373180                     | EF373078  | EF373236  | EF373128     |          |
|                 | <i>Erythrogonyx cinctus</i>       | EF373181                     | EF373079  | EF373237  | EF373129     |          |
|                 | <i>Eudromias morinellus</i>       | EF373182                     | EF373080  | EF373238  | EF373130     |          |
|                 | <i>Oreopholus ruficollis</i>      | EF373197                     | EF373096  | EF373254  | EF373146     |          |
|                 | <i>Peltohyas australis</i>        | EF373199                     | EF373098  | EF373256  | EF373148     |          |
|                 | <i>Phegornis mitchelli</i>        | AY228781                     | EF373099  | EF373257  | EF373149     |          |
|                 | <i>Pluvialis squatarola</i>       | EF373202                     | EF373101  | EF373259  | EF373151     |          |
|                 | <i>Thinornis novaeseelandiae</i>  | EF373214                     | EF373113  | EF373271  | EF373161     |          |
|                 | <i>Vanellus chilensis</i>         | AY228772                     | EF373115  | EF373274  | EF373163     |          |
|                 | Chionidae                         | <i>Chionis minor</i>         | AY228782  | DQ385272  | DQ385085     | DQ385221 |
| Glareolidae     | <i>Cursorius temminckii</i>       | AY228780                     | DQ385277  | DQ385090  | DQ385226     |          |
|                 | <i>Glareola maldivarus</i>        | -                            | EF373083  | EF373241  | EF373133     |          |
|                 | <i>Glareola nuchalis</i>          | AY228798                     | -         | -         | -            |          |
|                 | <i>Pluvianus aegyptius</i>        | EF373203                     | EF373102  | EF373260  | EF373152     |          |
|                 | <i>Rhinoptilus chalcopterus</i>   | EF373205                     | EF373105  | EF373263  | EF373154     |          |
|                 | <i>Stiltia isabella</i>           | EF373211                     | EF373110  | EF373268  | EF373159     |          |
| Haematopodidae  | <i>Haematopus ater</i>            | AY228794                     | NC 003713 | NC 003713 | NC 003713    |          |
| Ibidorhynchidae | <i>Ibidoryncha struthersii</i>    | EF373188                     | EF373086  | EF373244  | EF373136     |          |
| Jacanidae       | <i>Actophilornis africana</i>     | AY228791                     | EF373063  | EF373218  | EF373117     |          |
|                 | <i>Hydrophasianus chirurgis</i>   | EF373186                     | EF373085  | EF373243  | EF373135     |          |
|                 | <i>Irediparra gallinacea</i>      | EF373189                     | EF373087  | EF373245  | EF373137     |          |
|                 | <i>Jacana jacana</i>              | AY228776                     | DQ385273  | DQ385086  | DQ385222     |          |
|                 | <i>Microparra capensis</i>        | EF373194                     | EF373094  | EF373252  | EF373144     |          |
| Laridae         | <i>Creagrus furcatus</i>          | EF373178                     | EF373076  | EF373234  | EF373127     |          |
|                 | <i>Larus marinus</i>              | AY228799                     | EF373088  | EF373246  | EF373138     |          |
|                 | <i>Pagophila eburnea</i>          | EF373198                     | EF373097  | EF373255  | EF373147     |          |
|                 | <i>Rhodostethia rosea</i>         | EF373206                     | EF373106  | EF373264  | EF373155     |          |
|                 | <i>Rissa tridactyla</i>           | AY228785                     | DQ385280  | DQ385093  | DQ385229     |          |

|                  |                                    |          |           |           |           |
|------------------|------------------------------------|----------|-----------|-----------|-----------|
|                  | <i>Xema sabini</i>                 | EF373217 | EF373116  | EF373275  | EF373164  |
| Pedionomidae     | <i>Pedionomus torquatus</i>        | AY228789 | DQ385276  | DQ385089  | DQ385225  |
| Pluvianellidae   | <i>Pluvianellus socialis</i>       | AY228793 | DQ385271  | DQ385084  | DQ385220  |
| Recurvirostridae | <i>Cladorhynchus leucocephalus</i> | EF373176 | EF373074  | EF373232  | EF373125  |
|                  | <i>Himantopus mexicanus</i>        | AY228795 | DQ385268  | DQ385081  | DQ385217  |
|                  | <i>Recurvirostra americana</i>     | AY228800 | EF373104  | EF373262  | EF373153  |
| Rostratulidae    | <i>Nycticryphes semicollaris</i>   | AY228790 | DQ385274  | DQ385087  | DQ385223  |
|                  | <i>Rostratula benghalensis</i>     | AY228801 | EF373107  | EF373265  | EF373156  |
| Rynchopidae      | <i>Rynchops niger</i>              | AY228784 | DQ385281  | DQ385094  | DQ385230  |
| Scolopacidae     | <i>Actitis hypoleucos</i>          | AY894212 | AY894144  | AY894178  | AY894229  |
|                  | <i>Aphriza virgata</i>             | EF373169 | EF373067  | EF373224  | EF373120  |
|                  | <i>Arenaria interpres</i>          | AY228792 | NC_003712 | NC_003712 | NC_003712 |
|                  | <i>Bartramia longicauda</i>        | EF373171 | EF373069  | EF373226  | EF373122  |
|                  | <i>Calidris canutus</i>            | AY228777 | EF373071  | EF373228  | EF373123  |
|                  | <i>Catoptrophorus semipalmatus</i> | AY894207 | AY894139  | AY894173  | AY894224  |
|                  | <i>Coenocorypha aucklandica</i>    | EF373177 | EF373075  | EF373233  | EF373126  |
|                  | <i>Eurynorhynchus pygmeus</i>      | EF373183 | EF373081  | EF373239  | EF373131  |
|                  | <i>Gallinago gallinago</i>         | AY228775 | EF373082  | EF373240  | EF373132  |
|                  | <i>Heteroscelus incanus</i>        | AY894213 | AY894145  | AY894179  | AY894230  |
|                  | <i>Limicola falcinellus</i>        | EF373191 | EF373089  | EF373247  | EF373139  |
|                  | <i>Limnodromus scolopaceus</i>     | AY228774 | EF373090  | EF373248  | EF373140  |
|                  | <i>Limosa haemastica</i>           | AY228773 | EF373091  | EF373249  | EF373141  |
|                  | <i>Lymnocyptes minimus</i>         | EF373192 | EF373092  | EF373250  | EF373142  |
|                  | <i>Micropalama himantopus</i>      | EF373193 | EF373093  | EF373251  | EF373143  |
|                  | <i>Numenius minutus</i>            | EF373195 | EF373095  | EF373253  | EF373145  |
|                  | <i>Phalaropus tricolor</i>         | AY228778 | AY894155  | AY894189  | AY894240  |
|                  | <i>Philomachus pugnax</i>          | EF373201 | EF373100  | EF373258  | EF373150  |
|                  | <i>Scolopax minor</i>              | EF373207 | EF373108  | EF373266  | EF373157  |
|                  | <i>Tringa melanoleuca</i>          | AY228779 | AY894147  | AY894181  | AY894232  |
|                  | <i>Tryngites subruficollis</i>     | EF373215 | EF373114  | EF373272  | EF373162  |
|                  | <i>Xenus cinereus</i>              | AY894221 | AY894153  | AY894187  | AY894238  |
| Stercoriidae     | <i>Catharacta skua</i>             | AY228783 | DQ385278  | DQ385091  | DQ385227  |
|                  | <i>Stercorarius longicaudus</i>    | EF373208 | EF373109  | EF373267  | EF373158  |
| Sternidae        | <i>Anous tenuirostris</i>          | EF373168 | EF373066  | EF373223  | EF373119  |
|                  | <i>Chlidonias leucoptera</i>       | EF373175 | EF373073  | EF373231  | EF373124  |
|                  | <i>Gelochelidon nilotica</i>       | EF373184 | AY631347  | AY631383  | AY631311  |
|                  | <i>Gygis alba</i>                  | EF373185 | EF373084  | EF373242  | EF373134  |
|                  | <i>Hydroprogne caspia</i>          | EF373187 | AY631336  | AY631372  | AY631300  |
|                  | <i>Larosterna inca</i>             | EF373190 | AY631328  | AY631364  | AY631292  |
|                  | <i>Onychoprion anaethetus</i>      | -        | AY631332  | AY631368  | AY631296  |
|                  | <i>Onychoprion fuscata</i>         | EF373196 | -         | -         | -         |
|                  | <i>Phaetusa simplex</i>            | EF373200 | AY631329  | AY631293  | AY631293  |
|                  | <i>Sterna hirundo</i>              | EF373209 | AY631342  | AY631378  | AY631306  |
|                  | <i>Sternula superciliaris</i>      | EF373210 | AY631352  | AY631388  | AY631316  |
|                  | <i>Thalasseus eurygnatha</i>       | AY228786 | AY631339  | AY631375  | AY631303  |
| Thinocoridae     | <i>Attagis gayu</i>                | EF373170 | EF373068  | EF373225  | EF373121  |
|                  | <i>Thinocorus rumicivorus</i>      | EF373213 | EF373112  | EF373270  | EF373160  |
| Turnicidae       | <i>Turnix sylvatica</i>            | EF380262 | DQ385283  | DQ385096  | DQ385232  |
|                  | <i>Turnix hottentotta</i>          | AF143735 | -         | -         | -         |



|          |                             |          |          |          |          |
|----------|-----------------------------|----------|----------|----------|----------|
| Outgroup | <i>Pterocles orientalis</i> | AY228767 | -        | -        | -        |
|          | <i>Pterocles namaqua</i>    | -        | DQ385267 | DQ385080 | DQ385216 |
|          | <i>Columba livia</i>        | EF373500 | EF373295 | AF353433 | AF182694 |
|          | <i>Anhima cornuta</i>       | AY140765 | AY140699 | AY140737 | AY140735 |
|          | <i>Chauna torquata</i>      | AY140766 | AY140700 | AY140738 | AY140736 |
|          | <i>Crax blumenbachii</i>    | AY140775 | AF165444 | AY140747 | AF165468 |

Supplementary Table 2. Bayesian posterior distribution of divergence times. Mean, SD and 95% CrI are the mean estimate, standard deviation and 95% Credible Interval. Nodes are labeled as in Figure 2 in the main text.

| Node | Mean $\pm$ SD   | 95% CrI      | Node | Mean $\pm$ SD  | 95% CrI    |
|------|-----------------|--------------|------|----------------|------------|
| A1   | 122.2 $\pm$ 0.0 | 122.2, 122.2 | L20  | 22.9 $\pm$ 2.9 | 17.8, 28.6 |
| A2   | 102.9 $\pm$ 4.3 | 94.5, 111.6  | L21  | 62.9 $\pm$ 4.5 | 54.8, 72.0 |
| A3   | 93.1 $\pm$ 4.5  | 84.7, 102.1  | L22  | 52.0 $\pm$ 4.5 | 44.1, 60.8 |
| A4   | 88.5 $\pm$ 4.6  | 79.8, 97.8   | L23  | 45.2 $\pm$ 4.5 | 37.2, 54.3 |
| A5   | 101.6 $\pm$ 0.0 | 101.6, 101.6 | L24  | 42.8 $\pm$ 4.4 | 35.1, 51.7 |
| A6   | 93.3 $\pm$ 3.3  | 86.1, 99.2   | L25  | 40.2 $\pm$ 4.5 | 32.1, 49.4 |
| A7   | 29.7 $\pm$ 4.7  | 21.3, 39.5   | L26  | 32.6 $\pm$ 4.2 | 25.5, 40.8 |
| A8   | 84.1 $\pm$ 4.5  | 75.5, 92.8   | L27  | 30.0 $\pm$ 4.1 | 23.0, 38.2 |
| A9   | 77.0 $\pm$ 5.2  | 66.7, 87.0   | L28  | 22.5 $\pm$ 4.4 | 14.9, 31.3 |
| C1   | 88.6 $\pm$ 4.6  | 79.8, 97.9   | L29  | 46.9 $\pm$ 4.6 | 38.8, 56.4 |
| C2   | 85.1 $\pm$ 4.7  | 75.9, 94.7   | L30  | 21.0 $\pm$ 3.5 | 15.0, 28.2 |
| C3   | 69.0 $\pm$ 4.9  | 60.0, 78.8   | L31  | 14.7 $\pm$ 3.0 | 9.7, 20.9  |
| C4   | 61.7 $\pm$ 4.8  | 52.9, 71.5   | L32  | 17.3 $\pm$ 3.4 | 12.2, 24.2 |
| C5   | 59.9 $\pm$ 4.8  | 51.1, 69.6   | L33  | 24.0 $\pm$ 3.9 | 17.4, 31.6 |
| C6   | 55.8 $\pm$ 4.9  | 46.9, 65.8   | L34  | 72.4 $\pm$ 4.8 | 63.4, 82.2 |
| C7   | 51.3 $\pm$ 5.1  | 42.1, 61.5   | L35  | 62.3 $\pm$ 5.2 | 52.6, 72.6 |
| C8   | 39.6 $\pm$ 4.7  | 31.2, 49.3   | L36  | 29.6 $\pm$ 4.5 | 21.6, 38.9 |
| C9   | 27.7 $\pm$ 4.3  | 20.1, 36.6   | L37  | 0.1 $\pm$ 0.1  | 0.0, 0.2   |
| C10  | 57.1 $\pm$ 5.1  | 47.6, 67.3   | S1   | 73.4 $\pm$ 4.9 | 64.2, 83.3 |
| C11  | 50.6 $\pm$ 5.2  | 41.0, 61.2   | S2   | 63.7 $\pm$ 4.6 | 55.3, 72.9 |
| C12  | 39.0 $\pm$ 4.9  | 30.2, 49.0   | S3   | 57.1 $\pm$ 4.5 | 49.0, 66.1 |
| C13  | 66.1 $\pm$ 4.9  | 57.1, 76.1   | S4   | 50.9 $\pm$ 4.3 | 43.0, 59.3 |
| C14  | 49.2 $\pm$ 5.1  | 40.0, 59.4   | S5   | 47.3 $\pm$ 4.3 | 39.6, 55.7 |
| C15  | 36.9 $\pm$ 5.2  | 27.6, 47.5   | S6   | 41.0 $\pm$ 4.3 | 33.4, 49.4 |
| C16  | 23.2 $\pm$ 4.2  | 15.9, 31.8   | S7   | 29.0 $\pm$ 3.6 | 22.8, 36.1 |
| C17  | 45.3 $\pm$ 5.2  | 35.6, 56.0   | S8   | 27.1 $\pm$ 3.5 | 21.0, 33.9 |
| C18  | 79.9 $\pm$ 5.3  | 69.8, 90.4   | S9   | 16.1 $\pm$ 3.0 | 10.9, 22.3 |
| C19  | 36.2 $\pm$ 6.4  | 24.6, 49.4   | S10  | 23.6 $\pm$ 3.4 | 17.9, 30.3 |
| C20  | 28.3 $\pm$ 4.3  | 20.7, 37.4   | S11  | 26.9 $\pm$ 3.5 | 20.7, 34.0 |
| L1   | 84.7 $\pm$ 4.8  | 75.6, 94.3   | S12  | 42.8 $\pm$ 4.4 | 34.9, 51.4 |
| L2   | 77.6 $\pm$ 4.5  | 69.2, 86.5   | S13  | 39.2 $\pm$ 4.3 | 31.6, 47.7 |
| L3   | 68.0 $\pm$ 4.4  | 60.1, 76.8   | S14  | 36.8 $\pm$ 4.3 | 29.2, 45.3 |
| L4   | 63.7 $\pm$ 4.5  | 55.5, 72.7   | S15  | 20.6 $\pm$ 3.3 | 15.3, 26.9 |
| L5   | 61.0 $\pm$ 4.4  | 53.0, 69.8   | S16  | 18.8 $\pm$ 3.2 | 13.5, 25.0 |
| L6   | 59.3 $\pm$ 4.4  | 51.3, 68.1   | S17  | 46.4 $\pm$ 4.5 | 38.3, 55.2 |
| L7   | 36.3 $\pm$ 4.1  | 29.0, 44.4   | S18  | 41.6 $\pm$ 4.7 | 33.1, 50.8 |
| L8   | 28.9 $\pm$ 3.7  | 22.6, 36.3   | S19  | 27.4 $\pm$ 4.2 | 19.9, 35.9 |
| L9   | 22.1 $\pm$ 3.5  | 16.4, 28.9   | S20  | 42.7 $\pm$ 4.5 | 34.6, 51.7 |
| L10  | 13.8 $\pm$ 3.1  | 9.0, 19.5    | S21  | 47.7 $\pm$ 4.8 | 39.0, 57.3 |
| L11  | 0.4 $\pm$ 1.6   | 0.0, 0.8     | S22  | 65.2 $\pm$ 5.0 | 56.1, 75.3 |

|     |                |            |     |                |            |
|-----|----------------|------------|-----|----------------|------------|
| L12 | $25.7 \pm 3.7$ | 19.5, 33.0 | S23 | $60.1 \pm 4.9$ | 51.0, 70.2 |
| L13 | $22.1 \pm 3.5$ | 16.1, 29.3 | S24 | $48.5 \pm 4.9$ | 39.6, 58.5 |
| L14 | $33.0 \pm 4.2$ | 25.5, 41.4 | S25 | $37.6 \pm 4.8$ | 28.9, 47.4 |
| L15 | $55.2 \pm 4.5$ | 46.9, 64.2 | S26 | $26.0 \pm 4.2$ | 18.6, 34.9 |
| L16 | $25.7 \pm 2.8$ | 21.0, 31.3 | S27 | $28.1 \pm 4.1$ | 21.0, 36.4 |
| L17 | $19.3 \pm 1.8$ | 16.8, 22.8 | S28 | $44.7 \pm 5.1$ | 35.5, 55.3 |
| L18 | $17.8 \pm 1.4$ | 16.2, 20.7 | S29 | $55.3 \pm 5.2$ | 45.6, 65.8 |
| L19 | $16.8 \pm 1.0$ | 15.9, 19.0 | S30 | $39.6 \pm 5.0$ | 30.2, 49.8 |

Supplementary Table 3. Time constraints based on the fossil record or molecular dates. Node labels as in Fig. 1 in the main text. Fossil constraints are labeled A to N and are taken from Brodkorb (1964), except *Vegavis iaii* (Clarke et al. 2005) and were set as minimum ages. Molecular time constraints O and P are from Pereira and Baker (2006) and were fixed as shown.

| Node | Age (Myr) | Fossil                                                                                             | Split                                                                                                          |
|------|-----------|----------------------------------------------------------------------------------------------------|----------------------------------------------------------------------------------------------------------------|
| A    | 15.9      | Four spp of <i>Larus</i>                                                                           | <i>Larus</i> x <i>Rissa</i>                                                                                    |
| B    | 11.6      | <i>Uria antiquua</i>                                                                               | <i>Uria</i> x <i>Alca</i> , <i>Alle</i>                                                                        |
| C    | 2.6       | <i>Brachyramphus pliocen</i>                                                                       | <i>Brachyramphus</i> x <i>Cephus</i> ,<br><i>Synthliboramphus</i> , <i>Uria</i> , <i>Alca</i> ,<br><i>Alle</i> |
| D    | 2.6       | <i>Ptychoramphus tenuis</i>                                                                        | <i>Ptychoramphus</i> x <i>Aethia</i> ,<br><i>Cyclorhynca</i>                                                   |
| E    | 11.6      | <i>Cerorhinca dubia</i>                                                                            | <i>Cerorhinca</i> x <i>Fratercula</i>                                                                          |
| F    | 3.6       | <i>Calidris pacis</i>                                                                              | <i>Calidris</i> x <i>Aphriza</i>                                                                               |
| G    | 1.8       | <i>Micropalama hesternus</i>                                                                       | <i>Micropalama</i> x <i>Tryngites</i>                                                                          |
| H    | 33.9      | <i>Limosa gyporum</i>                                                                              | <i>Limosa</i> x <i>Prosobonia</i>                                                                              |
| I    | 11.6      | <i>Numenius antiquus</i>                                                                           | <i>Numenius</i> x <i>Bartramia</i>                                                                             |
| J    | 28.4      | <i>Charadrius sheppardianus</i>                                                                    | <i>Charadrius</i> x <i>Elseornis</i> ,<br><i>Thinornis</i>                                                     |
| K    | 28.4      | <i>Vanellus selysii</i>                                                                            | <i>Vanellus</i> x <i>Anarhynchus</i> ,<br><i>Peltohyas</i> , <i>Erythrogonys</i>                               |
| L    | 65.5      | Three spp of <i>Paleotringa</i>                                                                    | Scolopaci x Lari                                                                                               |
| M    | 65.5      | Three spp of <i>Cimolopteryx</i> ,<br><i>Ceramornis major</i> , Three spp<br>of <i>Paleotringa</i> | Charadriiformes x outgroups                                                                                    |
| N    | 65.5      | <i>Vegavis iaii</i>                                                                                | <i>Anas</i> x <i>Anhima</i> , <i>Chauna</i>                                                                    |
| O    | 101.6     | Molecular date                                                                                     | Anseriformes x Galliformes                                                                                     |
| P    | 122.2     | Molecular date                                                                                     | Galloanserae x Neoaves                                                                                         |
